# Supplementary material
Source: Springer Nature journal article supplement (https://www.springermedizin.de/resource/supplementary/12967_2011_961_MOESM1_ESM.pdf/9577282)

**Blood****B**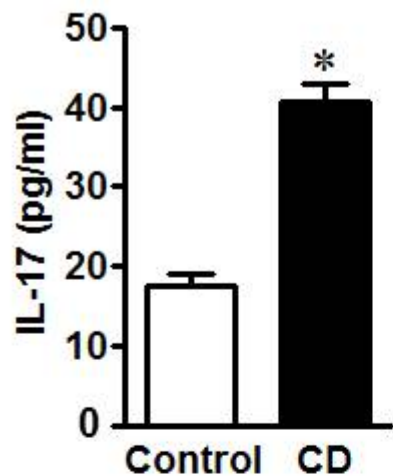**A**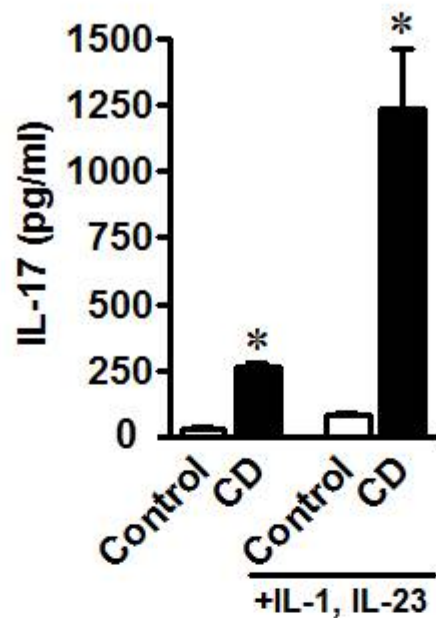**C**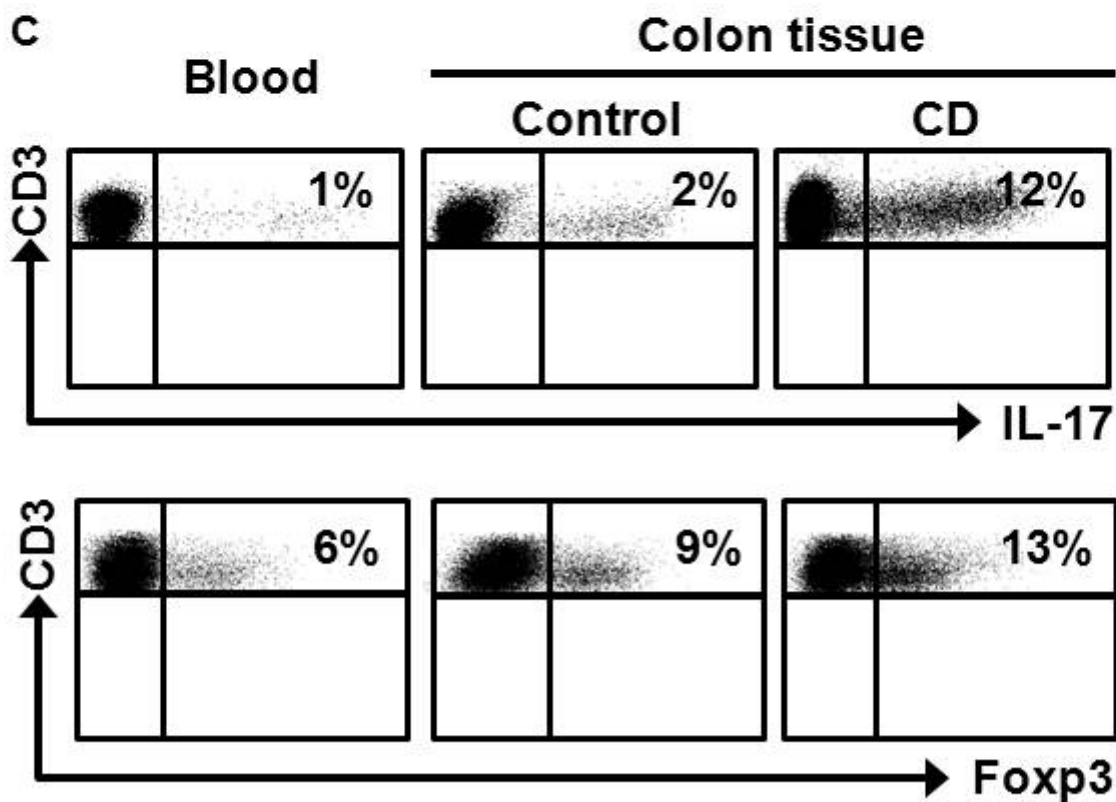

Supplement: MOESM1 [file 9577282]
